# Supplementary material
Source: publisher figshare collection journal article supplement (https://acs.figshare.com/ndownloader/files/4024552)
Supplement: Supplementary file 1 [file 4024552]

# An Experimental Study of the Solvent-Dependent Self-assembly/Disassembly and Conformer Preferences of Gramicidin A

*Liuxi Chen, Shu-Hua Chen and David H. Russell*

Laboratory for Biological Mass Spectrometry

Department of Chemistry, Texas A&M University, College Station, TX 77843

## Supporting information:

1. Figure S1. Expanded view of the ESI mass spectrum of the as received Fluka gramicidin sample.
2. Figure S2. H/D exchange data (plot of deuterium content vs. incubation time in deuteriated ( $\text{CH}_3\text{OD}$ )) for GA.
3. Figure S3. The fitting parameters of H/D exchange rates by Equation 2.

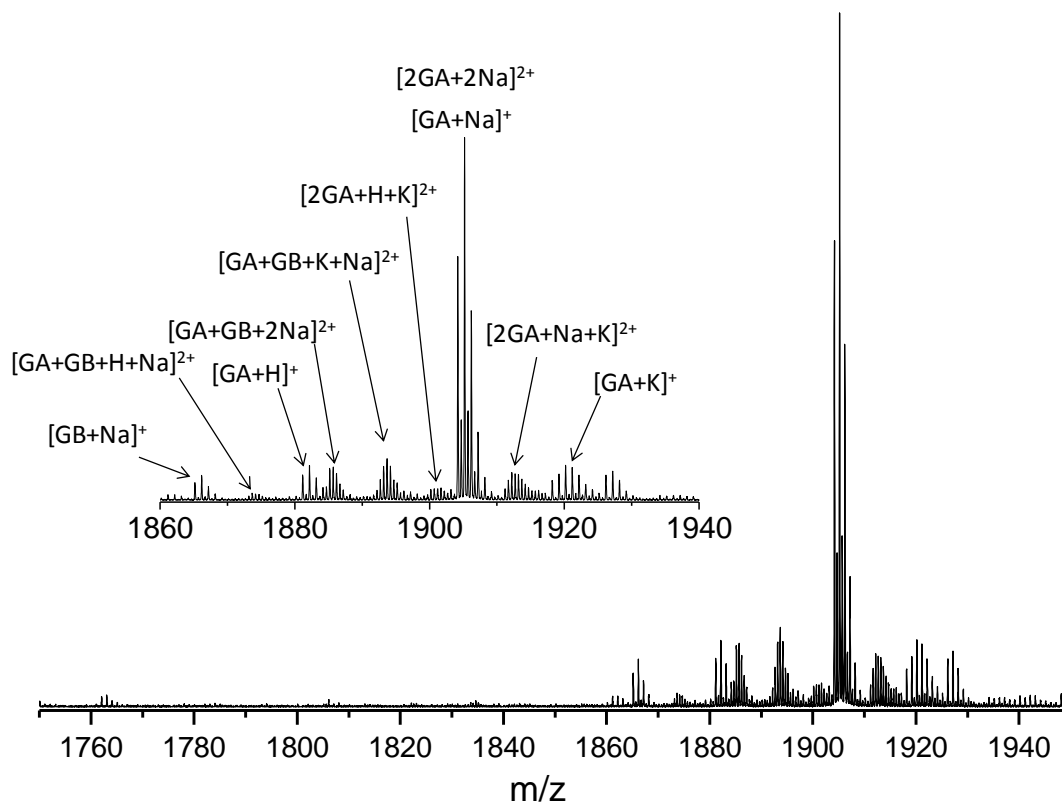

Figure S1. Expanded view of the ESI mass spectrum of the ‘as received’ Fluka gramicidin sample, which is a mixture containing gramicidins A, B, C and D. The spectrum contains signals for gramicidin A and gramicidin B, as well as signals that correspond to dimer ions composed of GA/GB; however, the signals are widely separated from the GA dimer and do not interfere with either the mass or ion mobility measurements. No signals for gramicidin C and D were observed.

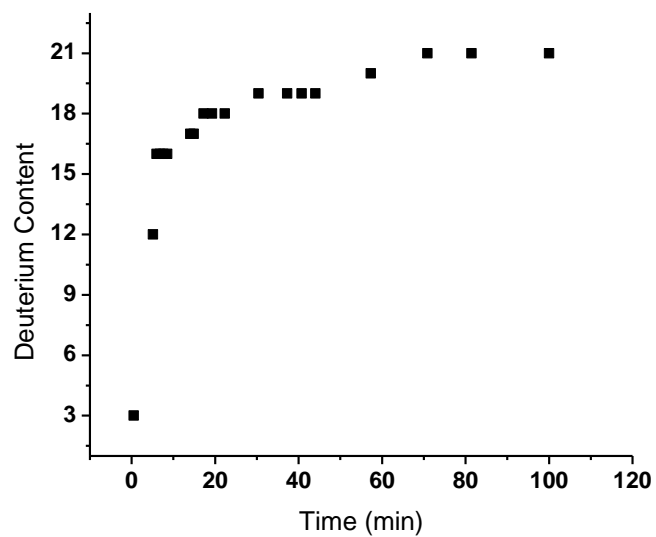

Figure S2. H/D exchange data (plot of deuterium content vs. incubation time in deuteriated ( $\text{CH}_3\text{OD}$ )) for GA. The data shows that all 21 exchangeable hydrogen atoms are exchanged for deuteriums during the 2 hr incubation.

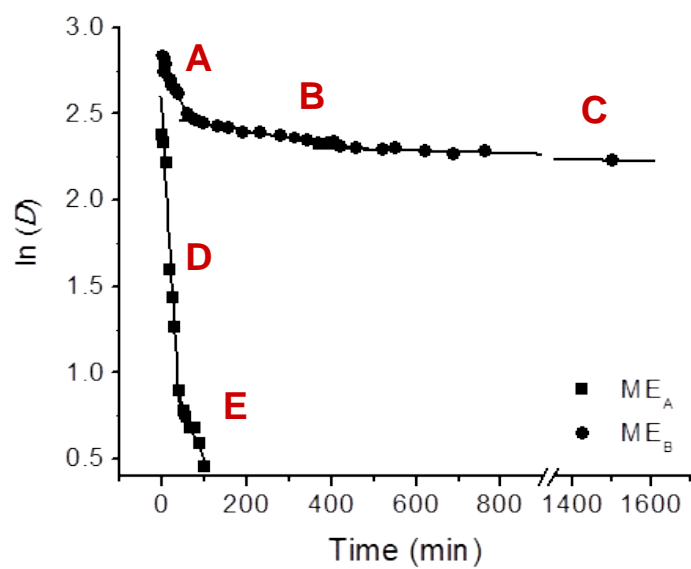

| Group         |   | $k_{\text{ex}}^i \text{ (min}^{-1}\text{)}$ | $\ln(H_{\text{tot}}^i)$ | $R^2$  |
|---------------|---|---------------------------------------------|-------------------------|--------|
| $\text{ME}_A$ | D | $4.1 \times 10^{-2}$                        | 2.5                     | 0.9660 |
|               | E | $6.4 \times 10^{-3}$                        | 1.1                     | 0.9472 |
| $\text{ME}_B$ | A | $5.5 \times 10^{-3}$                        | 2.8                     | 0.9452 |
|               | B | $4.0 \times 10^{-4}$                        | 2.4                     | 0.9817 |
|               | C | $6.3 \times 10^{-5}$                        | 2.3                     | 0.8968 |

Figure S3. The fitting parameters of H/D exchange rates by Equation 2.  $H_{\text{tot}}^i$  is the total number of exchangeable hydrogens,  $k_{\text{ex}}^i$  is the HDX rate constant, and  $t$  is the incubation time.
